# Supplementary material for: Hyperspectral Imaging in Major Hepatectomies: Preliminary Results from the Ex-Machyna Trial
Source: MDPI journal article supplement (doi:10.3390/cancers14225591), 2022-11-14
Supplement: s1 [file s1]

**Supplementary Materials**

**Table S1** Comparison of final hyperspectral indexes between patients with different perioperative features

**Table S2** Comparison of differential values of hyperspectral indexes between patients with different perioperative features

**Table S3** Correlation between final hyperspectral indexes and perioperative continuous variables

**Table S4** Correlation between differential hyperspectral indexes and perioperative continuous variables

**Table S1** Comparison of final hyperspectral indexes between patients with different perioperative features

|                                                        |                   | <b>TWI final</b> | <b>p</b> | <b>OHI final</b> | <b>p</b> | <b>StO<sub>2</sub> final</b> | <b>p</b> | <b>NIR final</b> | <b>p</b>    |
|--------------------------------------------------------|-------------------|------------------|----------|------------------|----------|------------------------------|----------|------------------|-------------|
| <b>BMI</b>                                             | <b>&lt; 30</b>    | 0.239 ± 0.086    | .384     | 0.680 ± 0.070    | .520     | 0.538 ± 0.135                | .154     | 0.237 ± 0.209    | .555        |
|                                                        | <b>≥ 30</b>       | 0.291 ± 0.104    |          | 0.710 ± 0.065    |          | 0.413 ± 0.041                |          | 0.137 ± 0.206    |             |
| <b>Pre-existing hepatopathy</b>                        | <b>No</b>         | 0.235 ± 0.085    | .118     | 0.682 ± 0.066    | .614     | 0.508 ± 0.139                | .840     | 0.200 ± 0.217    | .440        |
|                                                        | <b>Yes</b>        | 0.342 ± 0.053    |          | 0.710 ± 0.105    |          | 0.529 ± 0.096                |          | 0.308 ± 0.095    |             |
| <b>Neoadjuvant chemotherapy</b>                        | <b>No</b>         | 0.263 ± 0.089    | .501     | 0.668 ± 0.057    | .192     | 0.498 ± 0.157                | .650     | 0.188 ± 0.178    | .699        |
|                                                        | <b>Yes</b>        | 0.227 ± 0.094    |          | 0.719 ± 0.079    |          | 0.534 ± 0.075                |          | 0.265 ± 0.262    |             |
| <b>Preoperative portal embolization</b>                | <b>No</b>         | 0.234 ± 0.090    | .459     | 0.673 ± 0.048    | .429     | 0.454 ± 0.120                | .057     | 0.233 ± 0.249    | 1.000       |
|                                                        | <b>Yes</b>        | 0.271 ± 0.090    |          | 0.704 ± 0.090    |          | 0.587 ± 0.111                |          | 0.192 ± 0.147    |             |
| <b>Diabetes</b>                                        | <b>No</b>         | 0.230 ± 0.105    | .272     | 0.696 ± 0.080    | .496     | 0.517 ± 0.158                | .829     | 0.263 ± 0.218    | .240        |
|                                                        | <b>Yes</b>        | 0.286 ± 0.028    |          | 0.669 ± 0.041    |          | 0.500 ± 0.076                |          | 0.130 ± 0.166    |             |
| <b>Overall comorbidities</b>                           | <b>No</b>         | 0.195 ± 0.085    | .147     | 0.679 ± 0.057    | .816     | 0.496 ± 0.182                | .796     | 0.311 ± 0.276    | .304        |
|                                                        | <b>Yes</b>        | 0.272 ± 0.084    |          | 0.689 ± 0.074    |          | 0.517 ± 0.117                |          | 0.177 ± 0.172    |             |
| <b>Intraoperative transfusion</b>                      | <b>No</b>         | 0.260 ± 0.081    | .333     | 0.685 ± 0.072    | .843     | 0.503 ± 0.139                | .609     | 0.213 ± 0.203    | 1.000       |
|                                                        | <b>Yes</b>        | 0.191 ± 0.144    |          | 0.696 ± 0.047    |          | 0.557 ± 0.071                |          | 0.229 ± 0.304    |             |
| <b>Overall morbidity</b>                               | <b>No</b>         | 0.270 ± 0.050    | .495     | 0.693 ± 0.080    | .767     | 0.517 ± 0.057                | .880     | 0.224 ± 0.243    | .852        |
|                                                        | <b>Yes</b>        | 0.235 ± 0.110    |          | 0.681 ± 0.063    |          | 0.506 ± 0.172                |          | 0.209 ± 0.189    |             |
| <b>Postoperative Bilirubine &gt; 50 µmol/L in POD5</b> | <b>No</b>         | 0.254 ± 0.075    | .956     | 0.696 ± 0.075    | .653     | 0.497 ± 0.126                | .747     | 0.167 ± 0.170    | .622        |
|                                                        | <b>Yes</b>        | 0.257 ± 0.120    |          | 0.677 ± 0.068    |          | 0.524 ± 0.164                |          | 0.211 ± 0.197    |             |
| <b>Postoperative PT &lt; 50 sec in POD5</b>            | <b>No</b>         | 0.243 ± 0.083    | .726     | 0.696 ± 0.077    | .577     | 0.519 ± 0.087                | .758     | 0.188 ± 0.172    | .639        |
|                                                        | <b>Yes</b>        | 0.264 ± 0.115    |          | 0.671 ± 0.070    |          | 0.492 ± 0.208                |          | 0.212 ± 0.196    |             |
| <b>50-50 criteria</b>                                  | <b>No</b>         | 0.239 ± 0.078    | .533     | 0.689 ± 0.074    | .837     | 0.482 ± 0.132                | .409     | 0.166 ± 0.170    | .283        |
|                                                        | <b>Yes</b>        | 0.277 ± 0.128    |          | 0.679 ± 0.079    |          | 0.558 ± 0.168                |          | 0.261 ± 0.188    |             |
| <b>Healthy vs steatotic</b>                            | <b>Healthy</b>    | 0.247 ± 0.106    | .926     | 0.675 ± 0.056    | .599     | 0.473 ± 0.147                | .370     | 0.288 ± 0.242    | .268        |
|                                                        | <b>Steatotic</b>  | 0.252 ± 0.081    |          | 0.695 ± 0.078    |          | 0.539 ± 0.120                |          | 0.161 ± 0.169    |             |
| <b>Healthy vs fibrosis</b>                             | <b>Healthy</b>    | 0.266 ± 0.081    | .212     | 0.696 ± 0.074    | .073     | 0.490 ± 0.141                | .277     | 0.155 ± 0.169    | <b>.028</b> |
|                                                        | <b>Fibrosis</b>   | 0.192 ± 0.107    |          | 0.650 ± 0.013    |          | 0.587 ± 0.028                |          | 0.438 ± 0.193    |             |
| <b>Healthy vs cirrhosis</b>                            | <b>Healthy</b>    | 0.24 ± 0.0840    | .135     | 0.679 ± 0.064    | .139     | 0.515 ± 0.136                | .712     | 0.203 ± 0.208    | .442        |
|                                                        | <b>Cirrhosis*</b> | 0.380            |          | 0.785            |          | 0.461                        |          | 0.375            |             |
| <b>Vascular clamping</b>                               | <b>No</b>         | 0.290 ± 0.072    | .230     | 0.677 ± 0.078    | .717     | 0.566 ± 0.120                | .258     | 0.317 ± 0.228    | .177        |
|                                                        | <b>Yes</b>        | 0.228 ± 0.093    |          | 0.692 ± 0.066    |          | 0.480 ± 0.133                |          | 0.159 ± 0.180    |             |

\* only 1 case in the present population

BMI Body Mass Index, POD postoperative day, AST ASpartate transaminase, ALT ALanine Transaminase, ALP Alkaline Phosphatase, GGT Gamma-Glutamyl Transferase, PT Prothrombin Time, POD postoperative day

**Table S2** Comparison of differential values of hyperspectral indexes between patients with different perioperative features

|                                                        |                   | $\Delta$ TWI   | <i>p</i> | $\Delta$ OHI   | <i>p</i> | $\Delta$ StO <sub>2</sub> | <i>p</i> | $\Delta$ NIR   | <i>p</i> |
|--------------------------------------------------------|-------------------|----------------|----------|----------------|----------|---------------------------|----------|----------------|----------|
| <b>BMI</b>                                             | <b>&lt; 30</b>    | -0.020 ± 0.081 | .405     | -0.063 ± 0.071 | .785     | 0.053 ± 0.128             | .727     | -0.006 ± 0.212 | .257     |
|                                                        | <b>≥ 30</b>       | 0.033 ± 0.141  |          | -0.048 ± 0.123 |          | 0.017 ± 0.227             |          | -0.131 ± 0.131 |          |
| <b>Pre-existing hepatopathy</b>                        | <b>No</b>         | -0.002 ± 0.101 | .642     | -0.068 ± 0.081 | .377     | 0.064 ± 0.132             | .273     | -0.023 ± 0.205 | .769     |
|                                                        | <b>Yes</b>        | -0.038 ± 0.043 |          | -0.011 ± 0.070 |          | -0.062 ± 0.226            |          | -0.097 ± 0.215 |          |
| <b>Neoadjuvant chemotherapy</b>                        | <b>No</b>         | 0.015 ± 0.092  | .271     | -0.055 ± 0.078 | .827     | 0.052 ± 0.171             | .839     | -0.052 ± 0.216 | 1.000    |
|                                                        | <b>Yes</b>        | -0.045 ± 0.093 |          | -0.066 ± 0.091 |          | 0.034 ± 0.111             |          | -0.007 ± 0.189 |          |
| <b>Preoperative portal embolization</b>                | <b>No</b>         | -0.019 ± 0.102 | .657     | -0.053 ± 0.093 | .769     | -0.015 ± 0.144            | .104     | -0.055 ± 0.247 | .628     |
|                                                        | <b>Yes</b>        | 0.005 ± 0.091  |          | -0.067 ± 0.067 |          | 0.116 ± 0.121             |          | -0.010 ± 0.143 |          |
| <b>Diabetes</b>                                        | <b>No</b>         | -0.016 ± 0.085 | .703     | -0.085 ± 0.074 | .145     | 0.051 ± 0.184             | .854     | -0.064 ± 0.241 | .724     |
|                                                        | <b>Yes</b>        | 0.005 ± 0.116  |          | -0.018 ± 0.077 |          | 0.035 ± 0.063             |          | 0.011 ± 0.114  |          |
| <b>Overall comorbidities</b>                           | <b>No</b>         | -0.034 ± 0.106 | .526     | -0.108 ± 0.051 | .152     | 0.037 ± 0.142             | .899     | -0.068 ± 0.305 | 1.000    |
|                                                        | <b>Yes</b>        | 0.003 ± 0.092  |          | -0.038 ± 0.082 |          | 0.048 ± 0.155             |          | -0.020 ± 0.154 |          |
| <b>Intraoperative transfusion</b>                      | <b>No</b>         | -0.010 ± 0.098 | .791     | -0.066 ± 0.079 | .294     | 0.043 ± 0.152             | .863     | -0.037 ± 0.208 | 1.00     |
|                                                        | <b>Yes*</b>       | 0.017          |          | 0.024          |          | 0.071                     |          | -0.001         |          |
| <b>Overall morbidity</b>                               | <b>No</b>         | -0.039 ± 0.050 | .284     | -0.038 ± 0.072 | .405     | 0.015 ± 0.063             | .503     | 0.049 ± 0.165  | .295     |
|                                                        | <b>Yes</b>        | 0.018 ± 0.117  |          | -0.077 ± 0.086 |          | 0.0709 ± 0.19             |          | -0.107 ± 0.208 |          |
| <b>Postoperative Bilirubine &gt; 50 μmol/L in POD5</b> | <b>No</b>         | -0.027 ± 0.078 | .207     | -0.060 ± 0.079 | .841     | 0.028 ± 0.108             | .549     | -0.068 ± 0.188 | 1.000    |
|                                                        | <b>Yes</b>        | 0.048 ± 0.119  |          | -0.050 ± 0.101 |          | 0.088 ± 0.232             |          | -0.048 ± 0.197 |          |
| <b>Postoperative PT &lt; 50 sec in POD5</b>            | <b>No</b>         | -0.040 ± 0.079 | .120     | -0.088 ± 0.089 | .216     | 0.074 ± 0.115             | .475     | -0.013 ± 0.121 | .315     |
|                                                        | <b>Yes</b>        | 0.058 ± 0.112  |          | -0.022 ± 0.054 |          | -0.002 ± 0.230            |          | -0.161 ± 0.268 |          |
| <b>50-50 criteria</b>                                  | <b>No</b>         | -0.033 ± 0.076 | .122     | -0.087 ± 0.083 | .139     | 0.048 ± 0.129             | .951     | -0.067 ± 0.188 | .921     |
|                                                        | <b>Yes</b>        | 0.073 ± 0.133  |          | -0.003 ± 0.048 |          | 0.041 ± 0.261             |          | -0.068 ± 0.236 |          |
| <b>Healthy vs steatotic</b>                            | <b>Healthy</b>    | 0.011 ± 0.109  | .571     | -0.036 ± 0.056 | .438     | -0.040 ± 0.133            | .094     | -0.100 ± 0.280 | .370     |
|                                                        | <b>Steatotic</b>  | -0.020 ± 0.088 |          | -0.074 ± 0.092 |          | 0.098 ± 0.133             |          | 0.006 ± 0.134  |          |
| <b>Healthy vs fibrosis</b>                             | <b>Healthy</b>    | -0.001 ± 0.100 | .608     | -0.056 ± 0.086 | .777     | 0.043 ± 0.158             | .946     | -0.072 ± 0.187 | .115     |
|                                                        | <b>Fibrosis</b>   | -0.041 ± 0.047 |          | -0.0754 ± 0.01 |          | 0.052 ± 0.064             |          | 0.170 ± 0.163  |          |
| <b>Healthy vs cirrhosis</b>                            | <b>Healthy</b>    | -0.002 ± 0.096 | .525     | -0.067 ± 0.077 | .214     | 0.067 ± 0.127             | .050     | -0.017 ± 0.197 | .282     |
|                                                        | <b>Cirrhosis*</b> | -0.068         |          | 0.038          |          | -0.223                    |          | -0.249         |          |
| <b>Vascular clamping</b>                               | <b>No</b>         | -0.025 ± 0.079 | .615     | -0.042 ± 0.072 | .556     | 0.036 ± 0.186             | .871     | 0.079 ± 0.211  | .102     |
|                                                        | <b>Yes</b>        | 0.003 ± 0.106  |          | -0.070 ± 0.087 |          | 0.050 ± 0.129             |          | -0.106 ± 0.165 |          |

\* only 1 case in the present population

BMI Body Mass Index, POD postoperative day, AST ASpartate transaminase, ALT ALanine Transaminase, ALP Alkaline Phosphatase, GGT Gamma-Glutamyl Transferase, PT Prothrombin Time, POD postoperative day

**Table S3** Correlation between final hyperspectral indexes and perioperative continuous variables

|                                            | TWI final       |                 | OHI final       |                 | StO <sub>2</sub> final |                 | NIR final       |                 |
|--------------------------------------------|-----------------|-----------------|-----------------|-----------------|------------------------|-----------------|-----------------|-----------------|
|                                            | <b><i>ρ</i></b> | <b><i>p</i></b> | <b><i>ρ</i></b> | <b><i>p</i></b> | <b><i>ρ</i></b>        | <b><i>p</i></b> | <b><i>ρ</i></b> | <b><i>p</i></b> |
| <b>BMI</b>                                 | 0.045           | 0.878           | -0.138          | 0.638           | -0.085                 | 0.773           | -0.041          | 0.890           |
| <b>Preoperative bilirubine</b>             | -0.048          | 0.869           | 0.048           | 0.869           | -0.009                 | 0.976           | -0.026          | 0.929           |
| <b>Preoperative AST</b>                    | -0.106          | 0.719           | -0.247          | 0.395           | 0.249                  | 0.391           | 0.456           | 0.101           |
| <b>Preoperative ALT</b>                    | -0.480          | 0.082           | -0.436          | 0.119           | 0.145                  | 0.620           | 0.430           | 0.125           |
| <b>Preoperative ALP</b>                    | -0.108          | 0.714           | -0.011          | 0.970           | 0.359                  | 0.208           | 0.130           | 0.658           |
| <b>Preoperative GGT</b>                    | -0.029          | 0.923           | -0.288          | 0.318           | 0.372                  | 0.190           | 0.513           | 0.061           |
| <b>Preoperative Hemoglobin</b>             | 0.220           | 0.450           | -0.321          | 0.263           | -0.053                 | 0.858           | 0.097           | 0.742           |
| <b>Preoperative PT</b>                     | -0.147          | 0.616           | 0.368           | 0.196           | -0.334                 | 0.243           | -0.341          | 0.233           |
| <b>Preoperative INR</b>                    | 0.088           | 0.760           | -0.333          | 0.244           | 0.229                  | 0.432           | 0.284           | 0.325           |
| <b>Preoperative Albumin</b>                | -0.406          | 0.150           | -0.326          | 0.255           | -0.151                 | 0.607           | -0.035          | 0.904           |
| <b>Total resected segments</b>             | -0.135          | 0.646           | 0.042           | 0.887           | 0.246                  | 0.396           | -0.014          | 0.962           |
| <b>Total duration of vascular clamping</b> | -0.295          | 0.306           | 0.104           | 0.724           | -0.228                 | 0.434           | -0.237          | 0.416           |
| <b>Operative time</b>                      | 0.322           | 0.262           | 0.366           | 0.199           | -0.070                 | 0.811           | 0.196           | 0.502           |
| <b>AST POD1</b>                            | -0.123          | 0.675           | -0.075          | 0.799           | -0.299                 | 0.299           | -0.374          | 0.188           |
| <b>AST POD2</b>                            | -0.341          | 0.254           | -0.132          | 0.667           | -0.325                 | 0.279           | -0.380          | 0.201           |
| <b>AST POD5</b>                            | 0.105           | 0.734           | -0.050          | 0.872           | 0.083                  | 0.788           | 0.085           | 0.781           |
| <b>ALT POD1</b>                            | -0.156          | 0.594           | -0.130          | 0.658           | -0.367                 | 0.196           | -0.165          | 0.573           |
| <b>Bilirubin POD1</b>                      | -0.055          | 0.852           | 0.231           | 0.427           | 0.108                  | 0.714           | 0.002           | 0.994           |
| <b>Bilirubin POD2</b>                      | 0.140           | 0.648           | 0.124           | 0.687           | 0.003                  | 0.993           | 0.058           | 0.851           |
| <b>Bilirubin POD5</b>                      | 0.121           | 0.693           | 0.135           | 0.660           | -0.019                 | 0.950           | 0.121           | 0.693           |
| <b>ALP POD2</b>                            | -0.237          | 0.436           | -0.099          | 0.747           | 0.350                  | 0.241           | 0.171           | 0.577           |
| <b>ALP POD5</b>                            | -0.193          | 0.528           | -0.019          | 0.950           | 0.284                  | 0.347           | -0.113          | 0.713           |
| <b>GGT POD1</b>                            | -0.104          | 0.724           | -0.335          | 0.241           | 0.304                  | 0.290           | 0.359           | 0.207           |
| <b>GGT POD2</b>                            | 0.033           | 0.915           | -0.331          | 0.270           | 0.190                  | 0.534           | 0.259           | 0.393           |
| <b>GGT POD5</b>                            | -0.083          | 0.789           | -0.138          | 0.654           | 0.242                  | 0.426           | 0.110           | 0.720           |
| <b>PT POD2</b>                             | -0.025          | 0.936           | 0.220           | 0.469           | -0.110                 | 0.720           | -0.174          | 0.571           |
| <b>PT POD5</b>                             | -0.039          | 0.905           | 0.326           | 0.301           | -0.298                 | 0.347           | -0.424          | 0.170           |

BMI Body Mass Index, AST ASpartate transaminase, ALT ALanine Transaminase, ALP Alkaline Phosphatase, GGT Gamma-Glutamyl Transferase, PT Prothrombin Time, POD postoperative day

**Table S4** Correlation between differential hyperspectral indexes and perioperative continuous variables

|                                            | $\Delta$ TWI |       | $\Delta$ OHI |       | $\Delta$ StO <sub>2</sub> |       | $\Delta$ NIR |       |
|--------------------------------------------|--------------|-------|--------------|-------|---------------------------|-------|--------------|-------|
|                                            | $\rho$       | $p$   | $\rho$       | $p$   | $\rho$                    | $p$   | $\rho$       | $p$   |
| <b>BMI</b>                                 | 0.245        | 0.420 | 0.008        | 0.979 | 0.305                     | 0.310 | 0.077        | 0.802 |
| <b>Preoperative bilirubine</b>             | 0.467        | 0.108 | 0.159        | 0.603 | 0.033                     | 0.915 | -0.231       | 0.448 |
| <b>Preoperative AST</b>                    | 0.028        | 0.929 | -0.113       | 0.714 | -0.250                    | 0.409 | -0.030       | 0.922 |
| <b>Preoperative ALT</b>                    | -0.069       | 0.823 | -0.569       | 0.042 | 0.014                     | 0.964 | 0.171        | 0.577 |
| <b>Preoperative ALP</b>                    | 0.313        | 0.297 | -0.258       | 0.394 | 0.533                     | 0.061 | 0.022        | 0.943 |
| <b>Preoperative GGT</b>                    | 0.280        | 0.354 | 0.022        | 0.943 | -0.022                    | 0.943 | 0.088        | 0.775 |
| <b>Preoperative Hb</b>                     | 0.187        | 0.541 | -0.104       | 0.734 | -0.132                    | 0.668 | 0.044        | 0.887 |
| <b>Preoperative PT</b>                     | -0.304       | 0.312 | -0.008       | 0.978 | -0.014                    | 0.964 | 0.148        | 0.630 |
| <b>Preoperative INR</b>                    | 0.271        | 0.371 | -0.162       | 0.597 | 0.089                     | 0.771 | -0.162       | 0.597 |
| <b>Preoperative Albumine</b>               | -0.442       | 0.130 | -0.287       | 0.341 | -0.180                    | 0.557 | 0.135        | 0.659 |
| <b>Total resected segments</b>             | 0.356        | 0.233 | -0.347       | 0.246 | 0.603                     | 0.029 | -0.073       | 0.811 |
| <b>Total duration of vascular clamping</b> | 0.085        | 0.783 | 0.178        | 0.560 | -0.229                    | 0.451 | -0.490       | 0.089 |
| <b>Operative time</b>                      | 0.360        | 0.226 | 0.272        | 0.368 | -0.366                    | 0.219 | -0.616       | 0.025 |
| <b>AST POD1</b>                            | 0.445        | 0.128 | 0.363        | 0.223 | 0.016                     | 0.957 | -0.291       | 0.334 |
| <b>AST POD2</b>                            | 0.294        | 0.354 | 0.238        | 0.457 | 0.014                     | 0.966 | -0.189       | 0.557 |
| <b>AST POD5</b>                            | 0.263        | 0.409 | 0.231        | 0.470 | -0.546                    | 0.066 | -0.249       | 0.436 |
| <b>ALT POD1</b>                            | 0.407        | 0.168 | -0.016       | 0.957 | 0.071                     | 0.817 | -0.269       | 0.374 |
| <b>Bilirubine POD1</b>                     | 0.516        | 0.071 | -0.148       | 0.629 | 0.500                     | 0.082 | -0.121       | 0.694 |
| <b>Bilirubine POD2</b>                     | 0.545        | 0.067 | -0.056       | 0.863 | 0.308                     | 0.331 | -0.210       | 0.513 |
| <b>Bilirubine POD5</b>                     | 0.494        | 0.103 | -0.007       | 0.983 | 0.249                     | 0.436 | -0.221       | 0.491 |
| <b>ALP POD2</b>                            | 0.091        | 0.778 | -0.119       | 0.712 | 0.543                     | 0.068 | 0.294        | 0.353 |
| <b>ALP POD5</b>                            | -0.133       | 0.680 | 0.263        | 0.409 | 0.228                     | 0.477 | 0.242        | 0.449 |
| <b>GGT POD1</b>                            | 0.331        | 0.270 | -0.248       | 0.414 | 0.328                     | 0.274 | 0.292        | 0.333 |
| <b>GGT POD2</b>                            | 0.396        | 0.203 | -0.095       | 0.770 | 0.315                     | 0.318 | 0.074        | 0.820 |
| <b>GGT POD5</b>                            | -0.189       | 0.557 | 0.462        | 0.131 | -0.210                    | 0.513 | 0.028        | 0.931 |
| <b>PT POD2</b>                             | -0.508       | 0.092 | 0.175        | 0.586 | -0.207                    | 0.519 | 0.088        | 0.787 |
| <b>PT POD5</b>                             | -0.509       | 0.110 | -0.091       | 0.790 | -0.091                    | 0.790 | 0.018        | 0.958 |

BMI Body Mass Index, AST ASpartate transaminase, ALT ALanine Transaminase, ALP Alkaline Phosphatase, GGT Gamma-Glutamyl Transferase, PT Prothrombin Time, POD postoperative day
